# Supplementary material
Source: PubMed Central journal article supplement (PMC7561008)
Supplement: NIHMS1545839-supplement-1.pdf [file NIHMS1545839-supplement-1.pdf]

# Figure S2

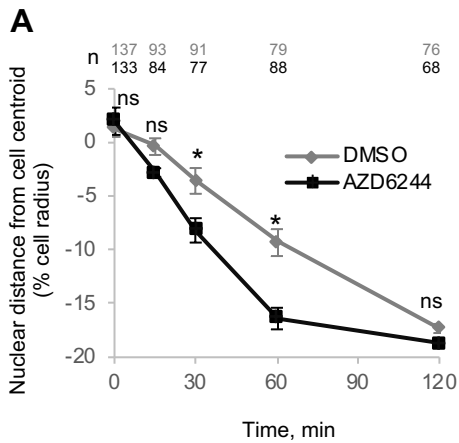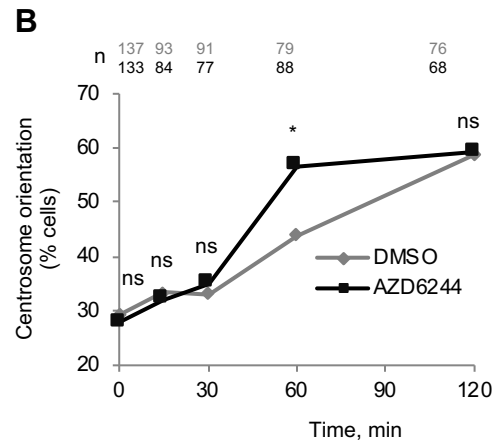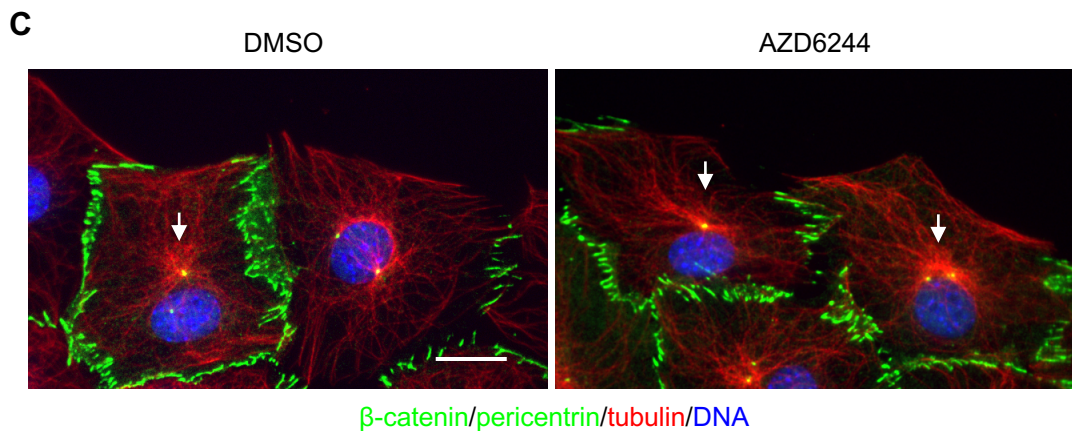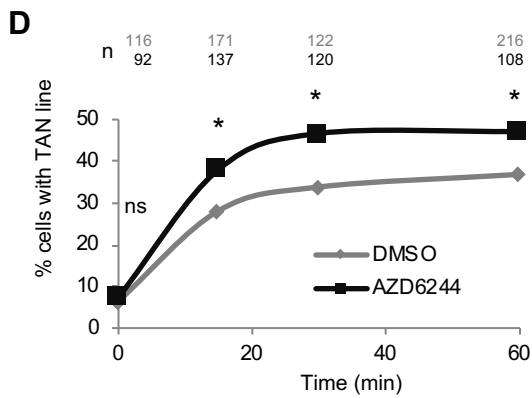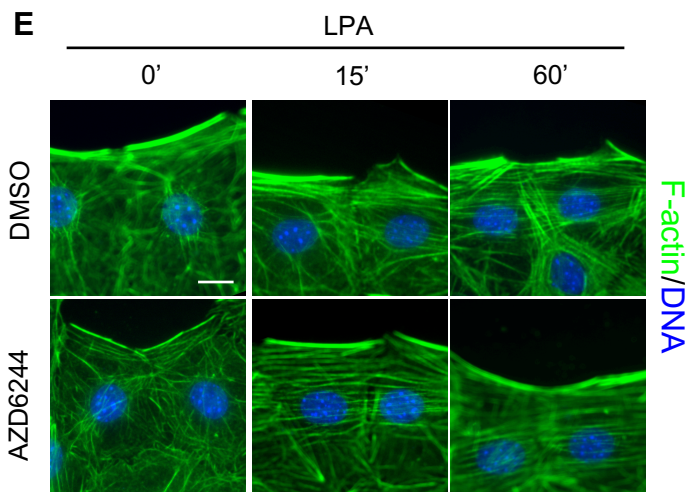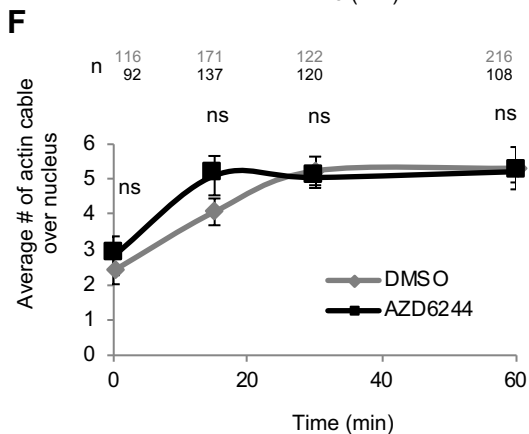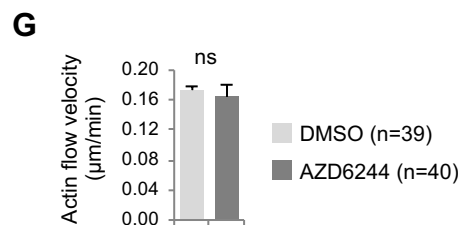

# Figure S3

A

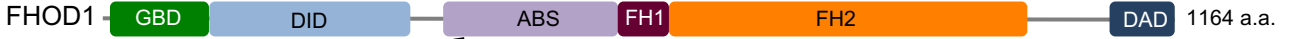

|             |              |          |                 |                 |              |          |          |          |              |          |       |     |
|-------------|--------------|----------|-----------------|-----------------|--------------|----------|----------|----------|--------------|----------|-------|-----|
|             | <b>*S387</b> |          |                 |                 | <b>*S498</b> |          |          |          | <b>*S523</b> |          |       |     |
| Human FHOD1 | 381          | GPTGPAS  | PVGP            | TS              | 492          | AARTPQSP | APCV     | 503      | 517          | EPLIPASP | KAEP  | 529 |
| Mouse FHOD1 | 384          | GSTGSAS  | PVG             | STP             | 496          | APRTQSP  | VSR      | 507      | 521          | KPVSPSP  | KAEP  | 533 |
| Horse FHOD1 | 380          | GPSGLAS  | PTGPASS         | PTSPASPLAPLTS   | 531          | APRTQSP  | TPRV     | 542      | 556          | ETLASPSP | KVEPI | 568 |
| Frog FHOD1  | 377          | QDENGTAP | TPAIKESSLQVPQFK | IVPPSPAKQLAKEEP | 620          | SPRERKSP | MIRAEEGQ | IENSTNTS | 672          | KTLMIPFR | KSSAV | 684 |

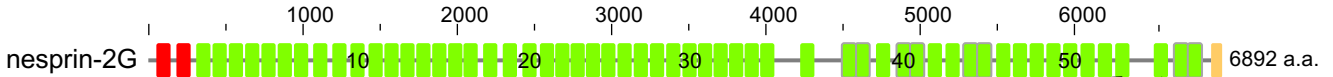

|              |               |            |            |             |               |           |         |            |               |          |       |           |         |       |
|--------------|---------------|------------|------------|-------------|---------------|-----------|---------|------------|---------------|----------|-------|-----------|---------|-------|
|              | <b>*S6376</b> |            |            |             | <b>*T6397</b> |           |         |            | <b>*S6471</b> |          |       |           |         |       |
| Human Nesp2G | 6384          | SEEPSSPQSL | CHLV       | APGHERSGCET | TPVSVDS       | IPLEWDHTG | DVGGSSS | HEDEEGPYYS | ALSDVEI       | PENPEAYL | KMTTK | TLKASSGKS | ISDGHSH | VDPSP |
| Mouse Nesp2G | 6371          | SEEPSQSL   | CHLVPPAL   | LGHERSGCET  | TPVSVDS       | IPLEWDHTG | DVGGSSS | HEDEEGPYYS | ALSDVEI       | PENPEAYL | KMTTK | SLQASSGKS | ISEGHPH | VDPSP |
| Horse Nesp2G | 6389          | SEEPSQSL   | CHLVPPAP   | GPERSGCET   | TPVSVDS       | IPLEWDHTG | DVGGSSS | HEDEEGPYYS | ALSDVEI       | PENPEAYL | KMTTK | TLKASSGKS | ISEGHPH | VDPSP |
| Frog Nesp2G  | 6458          | GSETSHP    | SICHLMPPNL | PHDRSGRET   | TPVSVDS       | IPLEWDHTG | DVGGSSS | HEDEEGTYFT | ALSDVEI       | PENPEAYL | IMTTK | SVQESSG   | QDPVK   | VTPWH |

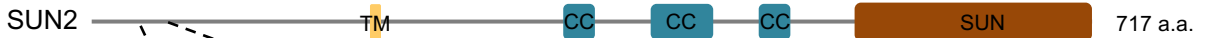

|            |             |        |         |    |
|------------|-------------|--------|---------|----|
|            | <b>*S54</b> |        |         |    |
| Human SUN2 | 48          | SNMKRL | SPAPQLG | 60 |
| Mouse SUN2 | 49          | SNMKHL | SPAPQLG | 61 |
| Horse SUN2 | 65          | SNMKRL | SPAPQLG | 77 |
| Frog SUN2  | 41          | TTLKH  | APTFR   | 50 |

B

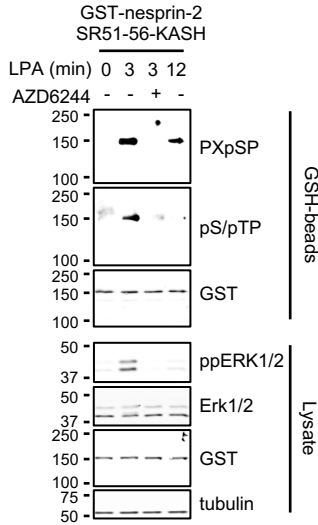

C

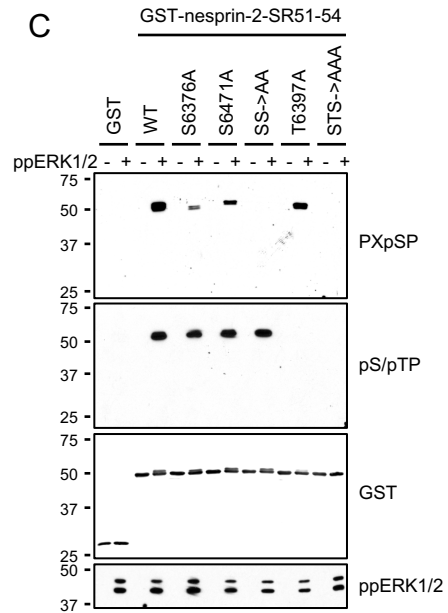

# Figure S4

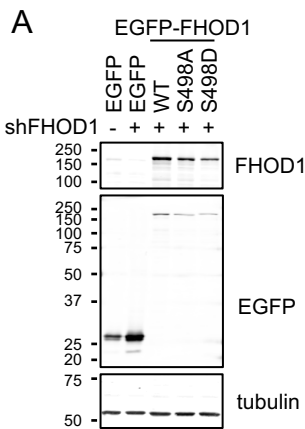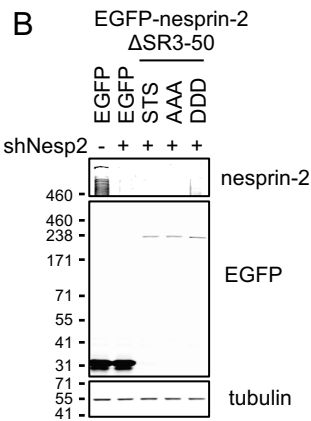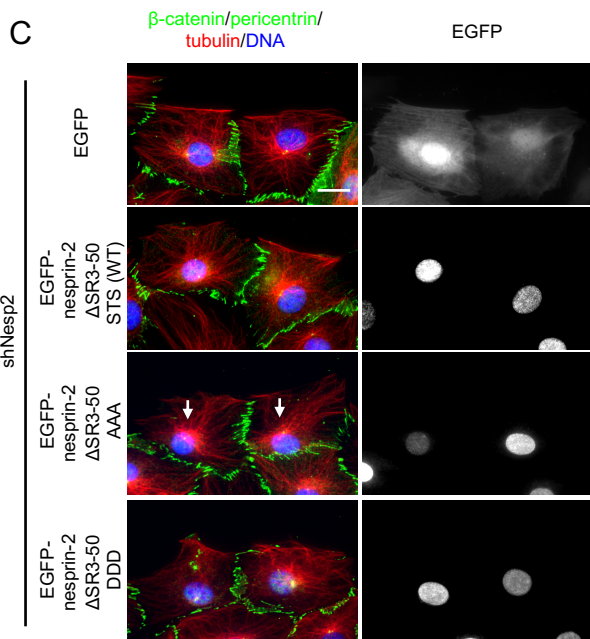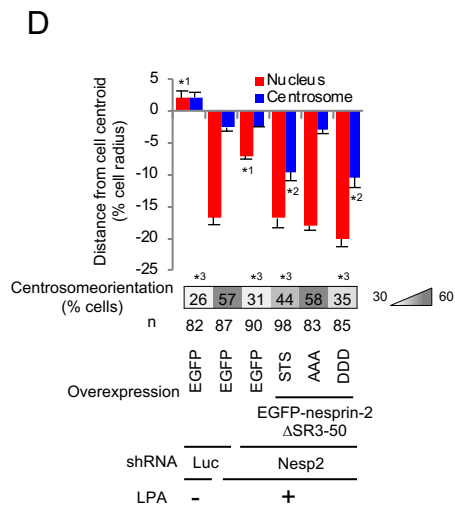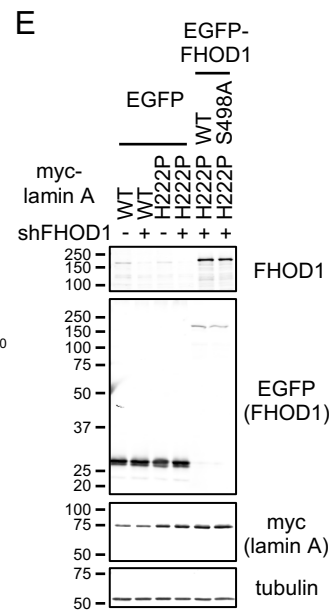

# Figure S5

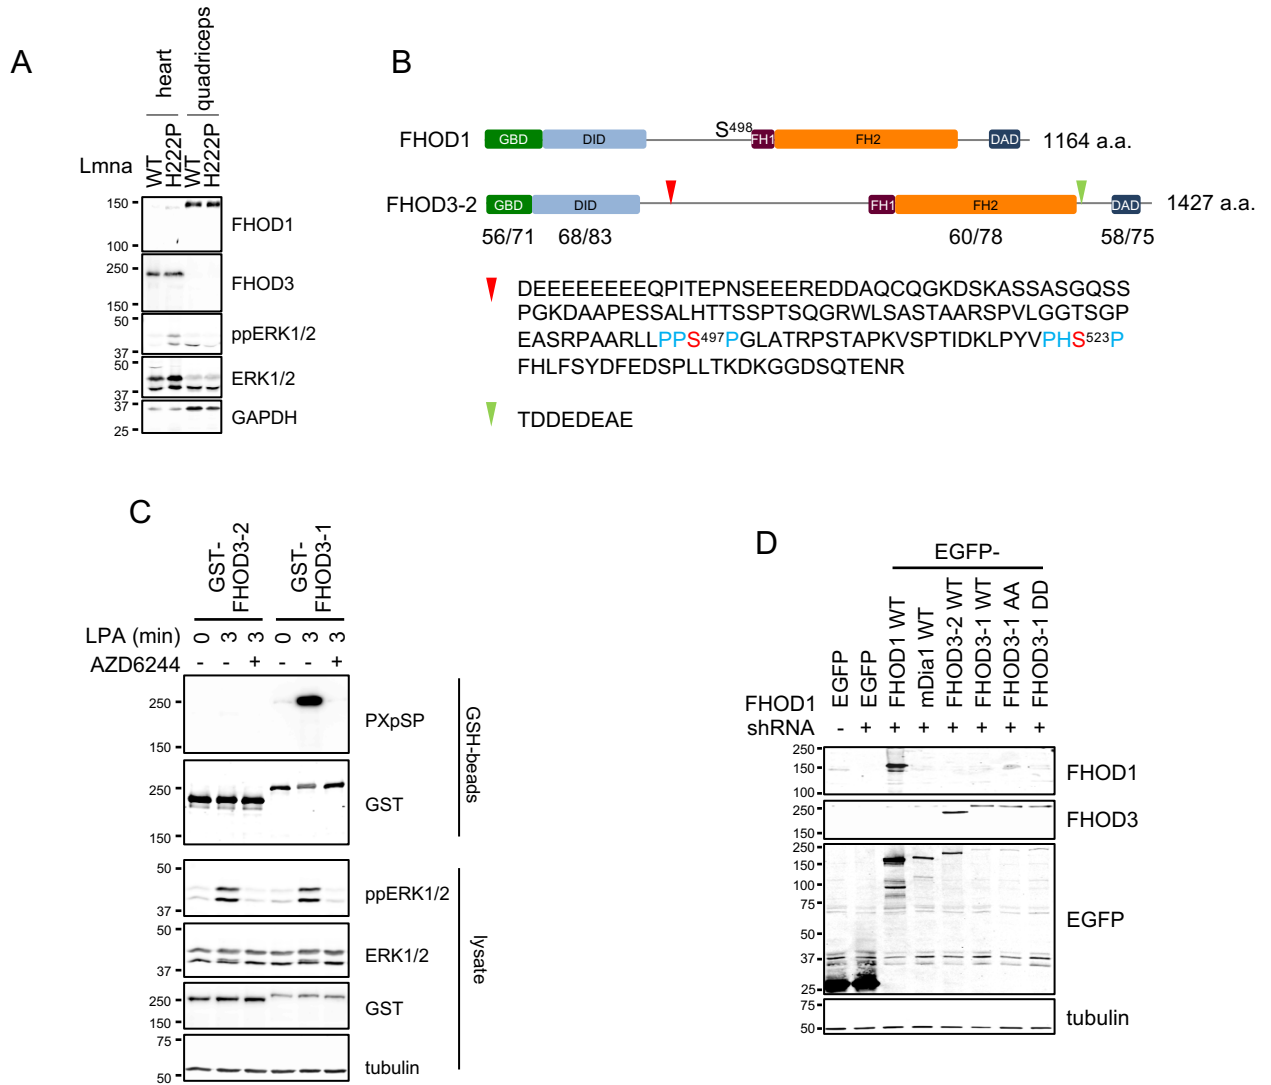

# Figure S6

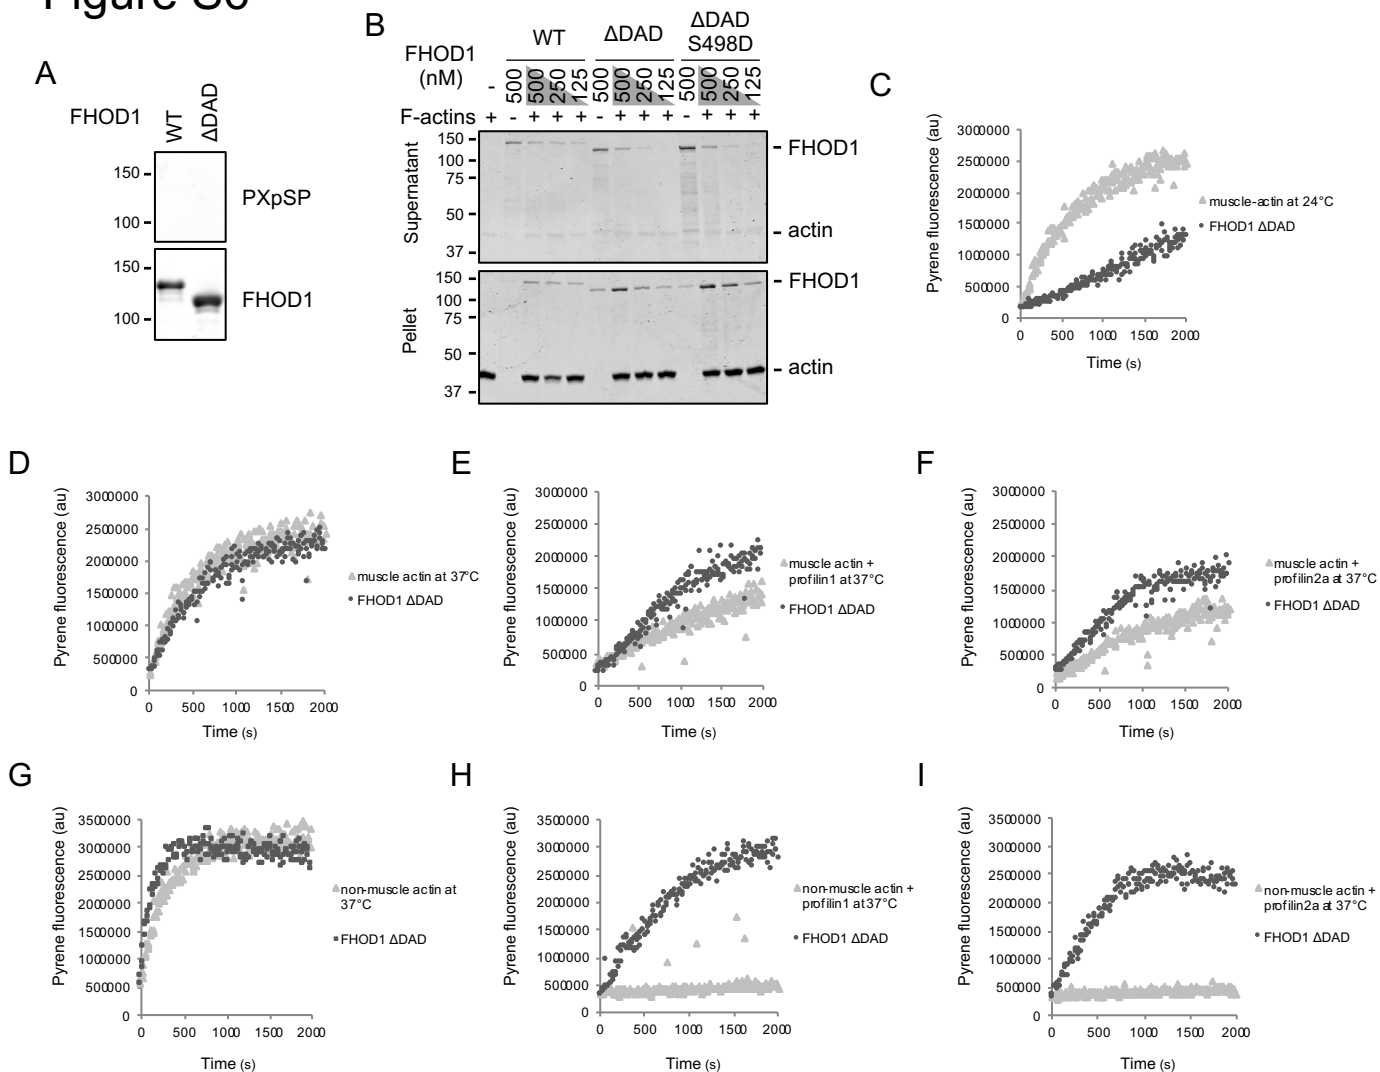

# Figure S7

**A**

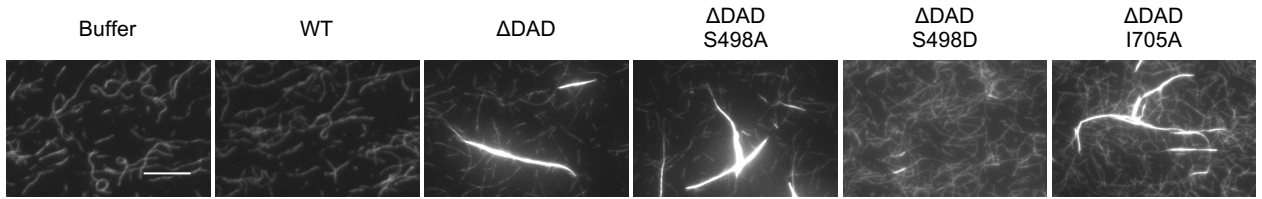

**B**

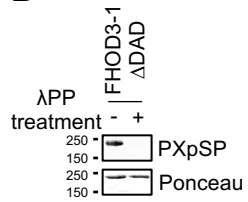

**C**

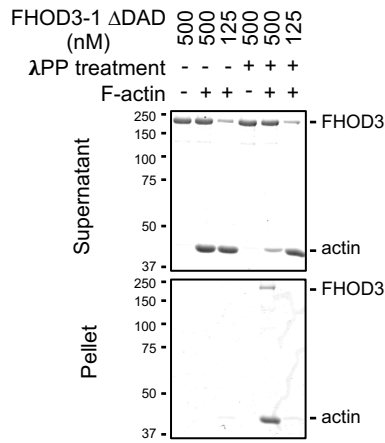

**D**

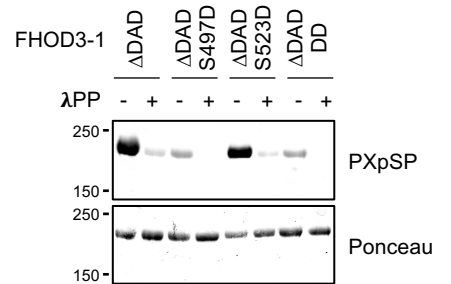

## SUPPLEMENTAL INFORMATION

### Figure S1. Expression of lamin A variants, related to Figure 2.

Western blots of NIH3T3 fibroblasts expressing the indicated myc-lamin A constructs. Antibodies used to probe the blots are indicated on the right. Arrow denotes nesprin-2G ; lower band is likely non-specific staining as only the top band was reduced by shRNA targeting nesprin-2G. Tubulin is a loading control. Migration of molecular mass (kDa) standards is shown at the left.

### Figure S2. Nuclear movement, TAN line formation, and Actin cable formation of NIH3T3 fibroblast cells treated with MEK1/2 inhibitor AZD6244, related to Figure 3.

(A) Time course of nuclear displacement in LPA-stimulated NIH3T3 fibroblasts treated with vehicle (DMSO) or AZD6244. Values are means  $\pm$  SEM; n, cell examined. \*p < 0.05; ns, p > 0.05. (B) Time course of centrosome orientation of NIH3T3 fibroblasts treated with DMSO or AZD6244 after LPA stimulation. Values are means  $\pm$  SEM; n, cells examined. \*p < 0.05. (C) Images of LPA-stimulated wound-edge NIH3T3 fibroblasts treated with DMSO or AZD6244 and stained for the indicated proteins and DAPI. Arrows, oriented centrosomes. Bar, 20  $\mu$ m. (D) Time course of TAN line formation in NIH3T3 fibroblasts stimulated with LPA and treated with vehicle (DMSO) or AZD6244. Values are means  $\pm$  SEM; n, cells examined. \*p < 0.05; ns, p > 0.05. (E) Images of LPA-stimulated wound-edge NIH3T3 fibroblasts treated with DMSO or AZD6244 and stained with fluorescently conjugated phalloidin (F-actin) and DAPI (DNA). Bar, 20  $\mu$ m. (F) Time course of actin cable formation over the nucleus in NIH3T3 fibroblasts stimulated with LPA and treated with vehicle (DMSO) or AZD6244. Values



are means  $\pm$  SEM; n, cells examined. \*p < 0.05; ns, p > 0.05. (G) Velocity of actin cable flow after LPA stimulation of NIH3T3 fibroblasts treated with vehicle (DMSO) or AZD6244. Values are means  $\pm$  SEM; n, cells examined. ns, p > 0.05.

**Figure S3. Predicted consensus ERK1/2 phosphorylation sites in TAN line components and evidence for nesprin-2 phosphorylated by ERK1/2, related to Figure 4.**

(A) Schematics of FHOD-1, nesprin-2G, and SUN2 and predicted ERK1/2 phosphorylation sites. Domains of FHOD1 and nesprin-2G are described in the legend to Figure 4. SUN2 domains are transmembrane membrane (TM), coiled-coil (CC) and the SUN domain (SUN). The sequence alignments below the protein diagrams depict the sequence homology among various species, with sequence conservation indicated by red (high), pink (moderate) and white (low). (B) Western blots of lysates of NIH3T3 fibroblasts expressing GST-nesprin-2-SR51-56-KASH construct probed with the antibodies indicated on the right. GST proteins were captured on GSH-beads before western blotting. Time after LPA stimulation and treatment with AZD6244 is indicated at the top of each lane. Tubulin is a loading control. (C) Western blots of GST or GST-nesprin-2-SR51-54 fusion proteins incubated without (-) or with (+) immunoprecipitated active ERK1/2 kinases (ppERK1/2) in the presence of ATP. Antibodies used to probe the blots are indicated on the right. GST-nesprin-2-SR51-54 SS->AA carries S6376A and S6471A mutations; STS->AAA carries S6376A, T6397A and S6471A mutations. In B and C, migration of molecular mass standards (kDa) is indicated at the left of each blot.

**Figure S4. Expression levels of nesprin-2  $\Delta$ SR3-50 and FHOD1 mutants in nesprin-2 or FHOD1 knockdown NIH3T3 fibroblasts and NIH3T3 fibroblasts expressing lamin A H222P, related to Figure 5.**

(A) Western blots of lysates of NIH3T3 fibroblasts with or without FHOD1 shRNA (shFHOD1) expression and expressing either EGFP or EGFP-tagged FHOD1 proteins.

Antibodies used to probe the blots are indicated on the right. (B) Western blots of lysates of NIH3T3 fibroblasts with or without nesprin-2 shRNA (shNesp2) expression and expressing either EGFP or EGFP-tagged nesprin-2  $\Delta$ SR3-50 proteins. Antibodies used to probe the blots are indicated on the right. EGFP-nesprin-2  $\Delta$ SR3-50 STS carries no mutation on S6376, T6397, and S6471; AAA carries S6376A, T6397A and S6471A mutations; and DDD carries S6376D, T6397D and S6471D mutations.

(C) Images of LPA-stimulated wound-edge NIH3T3 fibroblasts expressing EGFP or EGFP-tagged nesprin-2  $\Delta$ SR3-50 proteins after knockdown of nesprin-2 and stained for the indicated proteins and DAPI. White arrows, oriented centrosomes. Bars, 20  $\mu$ m.

(D) Centrosome and nuclear position and centrosome orientation for the cells treated as in A. Values are means  $\pm$  SEM; n, cells examined. Centrosome orientation (mean % of cells), is shown in the heat map below the histograms. \*<sup>1</sup> and \*<sup>2</sup> indicate  $p < 0.05$

compared to the rest of the samples for each category. \*<sup>3</sup> indicates  $p < 0.05$  compared to the LPA-stimulated control. (E) Western blots of lysates of NIH3T3 fibroblasts transfected with or without shRNA to knockdown endogenous FHOD1 (shFHOD1) and re-expressing either EGFP or EGFP-tagged FHOD1 as well as myc-tagged WT lamin A or lamin A H222P. Antibodies used to probe the blots are indicated on the right.

In A, B, and E, migration of molecular mass standards (kDa) is shown at the left of each blot.

**Figure S5. ERK1/2-catalyzed phosphorylation of the cardiac form of FHOD3, related to Figure 6.**

(A) Western blots of lysates from heart and quadriceps of 20-week-old WT and *Lmna*<sup>H222P/H222P</sup> (H222P) male mice probed with antibodies indicated on the right.

(B) Schematics of mouse FHOD1 and FHOD3. Domains are the same as those described for FHOD1 in the legend to Figure 4. The numbers below indicate the identity/similarity of each domain between human FHOD1 and mouse FHOD3. Red and green arrowheads indicate the sites of the two inserts in the cardiac form of mouse FHOD3, FHOD3-1. Sequences of the FHOD3-1 inserts are given below. (C) Western blots of lysates of NIH3T3 fibroblasts expressing GST-FHOD3-2 and FHOD3-1 probed with the antibodies indicated on the right. GST proteins were captured on GSH-beads before western blotting. Time after LPA stimulation and treatment with AZD6244 is indicated at the top of each lane. (D) Western blots of lysates of NIH3T3 fibroblasts transfected with or without shRNA transfection to knock down endogenous FHOD1 (shFHOD1) and re-expressing the indicated proteins. FHOD3-1 DD carries S497D and S523D mutations. Blots were probed using the antibodies indicated on the right.

In A, C, and D, migration of molecular mass standards (kDa) is shown at the left of each blot.

**Figure S6. The active form of FHOD1 stimulates polymerization of muscle and non-muscle actin in the presence of profilin, related to Figure 7.**

(A) Western blots of WT and FHOD1  $\Delta$ DAD proteins isolated from 293T cells and probed with antibodies against PXpSP or FHOD1. Migration of molecular mass standards (kDa) is indicated at the left of each blot. (B) Actin binding activity of FHOD1 proteins examined using a high-speed (100,000 x g) actin co-sedimentation assay.

Coomassie blue-stained SDS-polyacrylamide gels of proteins in the supernatant and pellet are shown. F-actin concentration was 2  $\mu$ M; FHOD1 protein concentration is as indicated. Migration of molecular mass standards (kDa) is indicated at the left.

(C-F) Polymerization of rabbit skeletal muscle actin by the activated form of FHOD1 (FHOD1  $\Delta$ DAD) measured by a pyrene-actin polymerization assay. 2  $\mu$ M muscle actin (10% pyrene-labeled) was pre-incubated with no profilin (C and D), 4  $\mu$ M human profilin1 (E) or profilin2a (F). Polymerization was initiated in the presence or absence of 50 nM FHOD1  $\Delta$ DAD at 24 °C (C) or 37°C (D-F). (G-I) Polymerization of human platelet non-muscle actin by FHOD1  $\Delta$ DAD measured by a pyrene-actin polymerization assay. 2.5  $\mu$ M non-muscle actin (10% pyrene-labeled) was pre-incubated with no profilin (G), 5  $\mu$ M profilin1 (H) or 5  $\mu$ M profilin2a (I). Polymerization was initiated in the presence or absence of 62.5 nM FHOD1  $\Delta$ DAD at 37 °C.

**Figure S7. FHOD1 and FHOD3 stimulate F-actin bundling, related to Figure 7.**

(A) TIRF images of Alexa-fluor 488 phalloidin decorated F-actin incubated with indicated purified FHOD1 protein. Note the lack of bundling by the phosphomimetic FHOD1  $\Delta$ DAD S498D. Bar, 5  $\mu$ m. (B) Western blots of purified FHOD3-1 proteins from 293T

cells before and after phosphatase treatment ( $\lambda$ PP). Blots were probed with the antibodies indicated in the right. (C) Actin bundling activity of purified FHOD3-1 before and after treatment with phosphatase ( $\lambda$ PP) assessed with a low speed actin co-sedimentation assay. Coomassie blue-stained SDS-polyacrylamide gels of proteins in the supernatant and pellet are shown. (D) Western blot of the indicated purified FHOD3-1 proteins before and after phosphatase treatment ( $\lambda$ PP) probed with anti-PXpSP antibody. A Ponceau S-stained blot is shown under the antibody probed blot. FHOD3-1  $\Delta$ DAD DD is FHOD3-1  $\Delta$ DAD S497D S523D. In B, C, and D, migration of molecular mass standards (kDa) is indicated at the left of each blot.
